# Supplementary material
Source: PubMed Central journal article supplement (PMC5363283)
Supplement: NIHMS848948-supplement-Supplemental_PDF.pdf [file NIHMS848948-supplement-Supplemental_PDF.pdf]

# SUPPLEMENTAL MATERIAL

## Contents

- Section 1. Supplemental Methods..... 2
  - Section 1.1. Summary of included businesses and municipal locations..... 2
  - Section 1.2. Data collection assumptions ..... 3
    - Section 1.2.1. Separate School assumptions ..... 3
    - Section 1.2.2. In Branch ATM assumptions..... 4
- Section 2. Supplemental Tables..... 6
  - Section 2.1. Coverage of location types and categories while taking account registered AEDs in Toronto. .... 6
- Section 3. Supplemental Figures and Figure Legends .....10
  - Section 3.1. Map of facilities .....10

## Section 1. Supplemental Methods

### Section 1.1. Summary of included businesses and municipal locations

Supplemental Table 1. Summary of businesses and municipal locations included in the study.

| Location Category,<br>(number of businesses in each<br>category) | Location Type‡     | Total Number of Facilities | Number of Facilities Downtown |
|------------------------------------------------------------------|--------------------|----------------------------|-------------------------------|
| <b>Bank (n = 5)</b>                                              | BMO Branch         | 96                         | 16                            |
|                                                                  | CIBC Branch        | 108                        | 17                            |
|                                                                  | RBC Branch         | 103                        | 18                            |
|                                                                  | Scotiabank Branch  | 98                         | 15                            |
|                                                                  | TD Branch          | 144                        | 22                            |
| <b>Bank ATM (n = 5)</b>                                          | BMO ATM            | 142                        | 30                            |
|                                                                  | CIBC ATM           | 187                        | 32                            |
|                                                                  | RBC ATM            | 264                        | 66                            |
|                                                                  | Scotiabank ATM     | 181                        | 33                            |
|                                                                  | TD ATM             | 178                        | 39                            |
| <b>Coffee Shop (n = 3)</b>                                       | Second Cup         | 80                         | 41                            |
|                                                                  | Starbucks          | 166                        | 75                            |
|                                                                  | Tim Hortons        | 312                        | 73                            |
| <b>Convenience Store (n = 2)</b>                                 | 7-Eleven           | 24                         | 6                             |
|                                                                  | Mac's              | 37                         | 2                             |
| <b>Gas Station (n = 3)</b>                                       | Esso               | 77                         | 4                             |
|                                                                  | Petrocan           | 74                         | 3                             |
|                                                                  | Shell              | 57                         | 2                             |
| <b>Grocery Store (n = 1)</b>                                     | Metro              | 28                         | 4                             |
| <b>Library (n = 1)</b>                                           | Library            | 101                        | 12                            |
| <b>Liquor/Beer Store (n = 2)</b>                                 | BeerStore          | 66                         | 8                             |
|                                                                  | LCBO               | 84                         | 17                            |
| <b>Parking Lot (n = 1)</b>                                       | Green P Parking    | 229                        | 39                            |
| <b>Pharmacy (n = 2)</b>                                          | Rexall             | 51                         | 13                            |
|                                                                  | Shoppers Drug Mart | 132                        | 25                            |
| <b>Recreational Facility (n = 2)</b>                             | Goodlife Fitness   | 42                         | 13                            |
|                                                                  | Swimming Pool      | 117                        | 7                             |
| <b>Restaurant Chain (n = 9)</b>                                  | Burger King        | 22                         | 4                             |
|                                                                  | Dairy Queen        | 23                         | 3                             |
|                                                                  | Harvey's           | 25                         | 4                             |
|                                                                  | McDonald's         | 94                         | 15                            |
|                                                                  | Pizza Nova         | 52                         | 6                             |
|                                                                  | Pizza Pizza        | 100                        | 14                            |
|                                                                  | Subway             | 281                        | 71                            |
|                                                                  | Swiss Chalet       | 35                         | 7                             |
|                                                                  | Wendy's            | 20                         | 3                             |
| <b>Retail Store (n = 2)</b>                                      | Canadian Tire      | 65                         | 7                             |
|                                                                  | UPS Store          | 36                         | 8                             |
| <b>School (n = 3)</b>                                            | Private School     | 211                        | 19                            |
|                                                                  | Public School      | 584                        | 29                            |
|                                                                  | Separate School    | 223                        | 9                             |

Shows the summary of businesses and municipal locations included in the study. The summary breaks down the number of businesses and municipal locations in each broadly defined Location Category, as well as the number of facilities in all of Toronto and downtown Toronto.

## Section 1.2. Data collection assumptions

Hours of operation could not be confirmed for 91 of the 223 Separate Schools, schools with students from a particular religious group, and 453 of the 952 Automated Teller Machines (ATMs), corresponding to the subset of ATMs located in bank branches, included in this study. We performed sensitivity analyses to determine the assumed hours of operations for these missing entries as described below.

### Section 1.2.1. Separate School assumptions

We conducted a sensitivity analysis where the hours of operation for the 91 schools with missing hours were set to: 1) the 90th percentile; and 2) 10th percentile of the known 132 entries to determine the impact of hours of operation on actual coverage. The average hours of operation of the 132 collected/known separate schools was calculated and found to be almost exactly 8:00am – 5:00pm for weekdays, in line with our original assumption, with the majority of separate schools closed on Saturday (69/132) and Sunday (74/132). Supplemental Table 2 shows the average and standard deviation of the collected hours. Supplemental Table 3 shows the 90<sup>th</sup> percentiles of collected separate school hours.

**Supplemental Table 2. Average hours of operations of the 132 known Separate School facilities.**

|                                 | Hours     | Mon. Open | Mon. Close | Tues. Open | Tues. Close | Wed. Open | Wed. Close | Thu. Open | Thu. Close | Fri. Open | Fri. Close |
|---------------------------------|-----------|-----------|------------|------------|-------------|-----------|------------|-----------|------------|-----------|------------|
| <b>Separate School (n =132)</b> | Average   | 7:58 AM   | 5:07 PM    | 8:01 AM    | 5:13 PM     | 8:01 AM   | 5:15 PM    | 8:01 AM   | 5:08 PM    | 8:01 AM   | 5:05 PM    |
|                                 | Std. Dev. | 0:52      | 2:02       | 1:05       | 2:14        | 1:05      | 2:17       | 1:05      | 2:11       | 1:05      | 2:05       |

**Supplemental Table 3. Hours of operations of the 132 known Separate School facilities based on the upper and lower 90<sup>th</sup> percentiles.**

|                                   | Mon. Open | Mon. Close | Tues. Open | Tues. Close | Wed. Open | Wed. Close | Thu. Open | Thu. Close | Fri. Open | Fri. Close |
|-----------------------------------|-----------|------------|------------|-------------|-----------|------------|-----------|------------|-----------|------------|
| <b>90<sup>th</sup> percentile</b> | 7:00 AM   | 7:57 PM    | 7:00 AM    | 8:00 PM     | 7:00 AM   | 8:27 PM    | 7:00 AM   | 6:27 PM    | 7:00 AM   | 6:27 PM    |
| <b>10<sup>th</sup> percentile</b> | 9:00 AM   | 3:00 PM    | 9:00 AM    | 3:00 PM     | 9:00 AM   | 3:00 PM    | 9:00 AM   | 3:00 PM    | 9:00 AM   | 3:00 PM    |

We found hours of operations of the missing entries have a minimal effect on actual coverage (Supplemental Table 4). Based on the sensitivity analysis, we used the average of 8:00am – 5:00pm as the hours of operations for missing Separate School entries to determine the rankings and results in the manuscript.

**Supplemental Table 4. Sensitivity analysis on actual coverage provided by Separate Schools using 3 hours of operations cases.**

| Operating Hour Assumption                       | Actual Coverage |
|-------------------------------------------------|-----------------|
| Base case: 8:00 AM – 5:00 PM                    | 16              |
| Sensitivity case 1: 90 <sup>th</sup> Percentile | 16              |
| Sensitivity case 2: 10 <sup>th</sup> Percentile | 15              |

## Section 1.2.2. In Branch ATM assumptions

Supplemental Table 5. Summary of the collected and missing data hours of operations for the 5 ATM categories.

| Location Type         | Total In Branch Facilities | Missing In Branch Facilities | Total Out of Branch Facilities | Missing Out of Branch Facilities | Total ATM facilities |
|-----------------------|----------------------------|------------------------------|--------------------------------|----------------------------------|----------------------|
| <b>BMO ATM</b>        | 96                         | 0                            | 46                             | 0                                | 142                  |
| <b>CIBC ATM</b>       | 108                        | 108                          | 79                             | 0                                | 187                  |
| <b>RBC ATM</b>        | 103                        | 103                          | 161                            | 0                                | 264                  |
| <b>Scotiabank ATM</b> | 98                         | 98                           | 84                             | 0                                | 181                  |
| <b>TD ATM</b>         | 144                        | 144                          | 34                             | 0                                | 178                  |
| <b>Total</b>          | 549                        | 453                          | 404                            | 0                                | 952                  |

The hours of operation of the 453 missing ATMs are associated with ATMs co-located with a branch (Supplemental Table 5). Hours information for all standalone ATMs (i.e., not located in a branch) have been collected. To assess the impact of the hours of operation of these missing in-branch ATMs on OHCA coverage, we performed a sensitivity analysis where their hours are set to: 1) branch hours of the locations housing each ATM; 2) 8:00am – 11:00pm; and 3) 24/7. We then calculate actual coverage for each of these three cases. The first case is a conservative estimate since in-branch ATMs should have hours of operation of at least the actual branch hours. Online hours of operation information, site visits conducted past midnight, and phone calls to local branches indicated 89 of 96 collected in-branch ATMs were available 24/7, which suggests that the third case is a reasonable, if slightly optimistic estimate of in-branch ATM hours. The intermediate case, 8:00am – 11:00pm, is what was in the original submission and based on sampling branch hours from site visits and online searching.

Our sensitivity analysis revealed that in all three cases, the five ATM categories remained in the top 10 location types ranked by actual coverage (Supplemental Tables 6 and 7). Furthermore, we found that the relative order of the rankings for the five ATM categories did not change for all of Toronto (i.e., RBC ATMs had the highest actual coverage in all three cases, followed by Scotiabank, CIBC, TD and BMO ATMs). No more than two of the ATM categories changed their relative order when examining the downtown Toronto subgroup, relative to the 8:00am – 11:00pm rankings (Supplemental Table 7). Based on these results, we used the 8:00am – 11:00pm assumption for in-branch ATMs as it is the middle ground between the 24/7 and branch hour estimates, and has similar results to the two other scenarios.

**Supplemental Table 6. In Branch ATM Sensitive Analysis: Top 10 businesses and municipal locations based on actual coverage with varying hours of operations for In Branch ATMs for all of Toronto**

| Rank | In Branch ATMs: 24/7 |                 |            |                     | In Branch ATMs: 8:00pm – 11:00pm |                 |            |                     | In Branch ATMs: Branch Hours |                 |            |                     |
|------|----------------------|-----------------|------------|---------------------|----------------------------------|-----------------|------------|---------------------|------------------------------|-----------------|------------|---------------------|
|      | Location Type        | Actual Coverage | Facilities | Coverage Efficiency | Location Type                    | Actual Coverage | Facilities | Coverage Efficiency | Location Type                | Actual Coverage | Facilities | Coverage Efficiency |
| 1    | Tim Hortons          | 286             | 312        | 0.9                 | Tim Hortons                      | 286             | 312        | 0.9                 | Tim Hortons                  | 286             | 312        | 0.9                 |
| 2    | RBC ATM              | 260             | 264        | 1.0                 | RBC ATM                          | 243             | 264        | 0.9                 | Subway                       | 228             | 281        | 0.8                 |
| 3    | Scotiabank ATM       | 229             | 181        | 1.3                 | Subway                           | 228             | 281        | 0.8                 | RBC ATM                      | 214             | 264        | 0.8                 |
| 4    | Subway               | 228             | 281        | 0.8                 | Scotiabank ATM                   | 216             | 181        | 1.2                 | Green P Parking              | 177             | 229        | 0.8                 |
| 5    | CIBC ATM             | 216             | 187        | 1.2                 | CIBC ATM                         | 198             | 187        | 1.1                 | Starbucks                    | 169             | 166        | 1.0                 |
| 6    | TD ATM               | 202             | 178        | 1.1                 | TD ATM                           | 183             | 178        | 1.0                 | Scotiabank ATM               | 157             | 181        | 0.9                 |
| 7    | Green P Parking      | 177             | 229        | 0.8                 | Green P Parking                  | 177             | 229        | 0.8                 | CIBC ATM                     | 154             | 187        | 0.8                 |
| 8    | Starbucks            | 169             | 166        | 1.0                 | Starbucks                        | 169             | 166        | 1.0                 | TD ATM                       | 148             | 178        | 0.8                 |
| 9    | BMO ATM              | 141             | 142        | 1.0                 | BMO ATM                          | 141             | 142        | 1.0                 | BMO ATM                      | 141             | 142        | 1.0                 |
| 10   | Second Cup           | 111             | 80         | 1.4                 | Second Cup                       | 111             | 80         | 1.4                 | Second Cup                   | 111             | 80         | 1.4                 |

**Supplemental Table 7. In Branch ATM Sensitive Analysis: Top 10 businesses and municipal locations based on actual coverage with varying hours of operations for In Branch ATMs for downtown Toronto**

| Rank | In Branch ATMs: 24/7 |                 |            |                     | In Branch ATMs: 8:00pm – 11:00pm |                 |            |                     | In Branch ATMs: Branch Hours |                 |            |                     |
|------|----------------------|-----------------|------------|---------------------|----------------------------------|-----------------|------------|---------------------|------------------------------|-----------------|------------|---------------------|
|      | Location Type        | Actual Coverage | Facilities | Coverage Efficiency | Location Type                    | Actual Coverage | Facilities | Coverage Efficiency | Location Type                | Actual Coverage | Facilities | Coverage Efficiency |
| 1    | Starbucks            | 110             | 75         | 1.5                 | Starbucks                        | 110             | 75         | 1.5                 | Starbucks                    | 110             | 75         | 1.5                 |
| 2    | RBC ATM              | 101             | 66         | 1.5                 | Tim Hortons                      | 97              | 73         | 1.3                 | Tim Hortons                  | 97              | 73         | 1.3                 |
| 3    | Tim Hortons          | 97              | 73         | 1.3                 | RBC ATM                          | 94              | 66         | 1.4                 | RBC ATM                      | 89              | 66         | 1.3                 |
| 4    | TD ATM               | 84              | 39         | 2.2                 | Scotiabank ATM                   | 77              | 33         | 2.3                 | Subway                       | 77              | 71         | 1.1                 |
| 5    | Scotiabank ATM       | 82              | 33         | 2.5                 | Subway                           | 77              | 71         | 1.1                 | Second Cup                   | 67              | 41         | 1.6                 |
| 6    | Subway               | 77              | 71         | 1.1                 | TD ATM                           | 75              | 39         | 1.9                 | TD ATM                       | 64              | 39         | 1.6                 |
| 7    | CIBC ATM             | 70              | 32         | 2.2                 | Second Cup                       | 67              | 41         | 1.6                 | Scotiabank ATM               | 62              | 33         | 1.9                 |
| 8    | Second Cup           | 67              | 41         | 1.6                 | CIBC ATM                         | 64              | 32         | 2.0                 | BMO ATM                      | 56              | 30         | 1.9                 |
| 9    | BMO ATM              | 56              | 30         | 1.9                 | BMO ATM                          | 56              | 30         | 1.9                 | CIBC ATM                     | 54              | 32         | 1.7                 |
| 10   | Shoppers Drug Mart   | 53              | 25         | 2.1                 | Shoppers Drug Mart               | 53              | 25         | 2.1                 | Shoppers Drug Mart           | 53              | 25         | 2.1                 |

## Section 2. Supplemental Tables

### Section 2.1. Coverage of location types and categories while taking account registered AEDs in Toronto.

Supplemental Table 8 shows the coverage of downtown Toronto of the 41 businesses and municipal locations with respect to the public OHCAs that are not already covered by a registered AED in Toronto. The Top 9 ranked location types are the same as the downtown rankings without considering registered AEDs (Table 3). All 3 Coffee Shops and 5 Bank ATM location types are within the Top 10 location types in terms of actual coverage. Supplemental Supplemental Tables 9 and 10 show the coverage for the 14 broadly defined location categories in all of Toronto and downtown respectively when considering the registered AED network in Toronto. In both cases, Bank ATMs, Coffee Shops and Restaurant Chains are in the Top 3 location categories in terms of actual coverage, with Bank ATMs ranked first.

**Supplemental Table 8. Businesses and municipal locations ranked by actual coverage in downtown Toronto based on public OHCAs not already covered by a registered AED.**

| Downtown Rank | Location Type†     | Location category | Actual Coverage | Assumed 24/7 Coverage, (Rank) | Number of Facilities, (Rank) | Coverage Efficiency, (Rank) | Coverage Loss, % (Rank) |
|---------------|--------------------|-------------------|-----------------|-------------------------------|------------------------------|-----------------------------|-------------------------|
| 1             | RBC ATM            | Bank ATM          | 56              | 67 (2)                        | 66 (4)                       | 0.85 (19)                   | 16.4 (16)               |
| 2             | Starbucks          | Coffee Shop       | 55              | 70 (1)                        | 75 (1)                       | 0.73 (22)                   | 21.4 (17)               |
| 3             | Tim Hortons        | Coffee Shop       | 45              | 59 (3)                        | 73 (2)                       | 0.62 (27)                   | 23.7 (20)               |
| 4             | TD ATM             | Bank ATM          | 44              | 58 (4)                        | 39 (6)                       | 1.13 (11)                   | 24.1 (21)               |
| 5             | Subway             | Restaurant Chain  | 40              | 51 (5)                        | 71 (3)                       | 0.56 (30)                   | 21.6 (18)               |
| 6             | CIBC ATM           | Bank ATM          | 37              | 44 (6)                        | 32 (9)                       | 1.16 (9)                    | 15.9 (15)               |
| 7             | Second Cup         | Coffee Shop       | 33              | 43 (7)                        | 41 (5)                       | 0.80 (20)                   | 23.3 (19)               |
| 8             | BMO ATM            | Bank ATM          | 31              | 33 (9)                        | 30 (10)                      | 1.03 (12)                   | 6.1 (9)                 |
| 9             | Scotiabank ATM     | Bank ATM          | 30              | 34 (8)                        | 33 (8)                       | 0.91 (18)                   | 11.8 (13)               |
| 10            | Green P Parking    | Parking Lot       | 26              | 28 (12)                       | 39 (6)                       | 0.67 (24)                   | 7.1 (10)                |
| 11            | Shoppers Drug Mart | Pharmacy          | 24              | 27 (13)                       | 25 (12)                      | 0.96 (16)                   | 11.1 (11)               |
| 12            | Rexall             | Pharmacy          | 22              | 31 (10)                       | 13 (22)                      | 1.69 (4)                    | 29.0 (25)               |
| 13            | Pizza Nova         | Restaurant Chain  | 19              | 20 (18)                       | 6 (31)                       | 3.17 (2)                    | 5.0 (7)                 |
| 14            | Pizza Pizza        | Restaurant Chain  | 18              | 26 (14)                       | 14 (21)                      | 1.29 (7)                    | 30.8 (26)               |
| 15            | McDonald's         | Restaurant Chain  | 17              | 20 (18)                       | 15 (19)                      | 1.13 (10)                   | 15.0 (14)               |
| 16            | 7-Eleven           | Convenience Store | 16              | 16 (22)                       | 6 (31)                       | 2.67 (3)                    | 0.0 (1)                 |
| 17            | CIBC Branch        | Bank              | 16              | 29 (11)                       | 17 (16)                      | 0.94 (17)                   | 44.8 (30)               |
| 18            | Burger King        | Restaurant Chain  | 16              | 17 (21)                       | 4 (33)                       | 4.00 (1)                    | 5.9 (8)                 |
| 19            | TD Branch          | Bank              | 15              | 23 (15)                       | 22 (13)                      | 0.68 (23)                   | 34.8 (27)               |
| 20            | BMO Branch         | Bank              | 10              | 18 (20)                       | 16 (18)                      | 0.63 (26)                   | 44.4 (29)               |

|                |                   |                       |             |             |             |             |             |
|----------------|-------------------|-----------------------|-------------|-------------|-------------|-------------|-------------|
| 21             | Swiss Chalet      | Restaurant Chain      | 10          | 21 (17)     | 7 (28)      | 1.43 (6)    | 52.4 (33)   |
| 22             | LCBO              | Liquor/Beer Store     | 10          | 14 (24)     | 17 (16)     | 0.59 (29)   | 28.6 (23)   |
| 23             | RBC Branch        | Bank                  | 9           | 23 (15)     | 18 (15)     | 0.50 (31)   | 60.9 (36)   |
| 24             | Goodlife Fitness  | Recreational Facility | 8           | 9 (27)      | 13 (22)     | 0.62 (28)   | 11.1 (11)   |
| 25             | BeerStore         | Liquor/Beer Store     | 8           | 11 (26)     | 8 (26)      | 1.00 (13)   | 27.3 (22)   |
| 26             | Private School    | School                | 6           | 13 (25)     | 19 (14)     | 0.32 (35)   | 53.8 (34)   |
| 27             | UPS Store         | Retail Store          | 6           | 15 (23)     | 8 (26)      | 0.75 (21)   | 60.0 (35)   |
| 28             | Harvey's          | Restaurant Chain      | 5           | 7 (32)      | 4 (33)      | 1.25 (8)    | 28.6 (23)   |
| 29             | Dairy Queen       | Restaurant Chain      | 5           | 8 (30)      | 3 (37)      | 1.67 (5)    | 37.5 (28)   |
| 30             | Metro             | Grocery Store         | 4           | 4 (33)      | 4 (33)      | 1.00 (13)   | 0.0 (1)     |
| 31             | Swimming Pool     | Recreational Facility | 3           | 8 (30)      | 7 (28)      | 0.43 (33)   | 62.5 (37)   |
| 32             | Scotiabank Branch | Bank                  | 2           | 9 (27)      | 15 (19)     | 0.13 (38)   | 77.8 (40)   |
| 33             | Public School     | School                | 2           | 9 (27)      | 29 (11)     | 0.07 (41)   | 77.8 (40)   |
| 34             | Mac's             | Convenience Store     | 2           | 2 (36)      | 2 (40)      | 1.00 (13)   | 0.0 (1)     |
| 35             | Petrocan          | Gas Station           | 2           | 2 (36)      | 3 (37)      | 0.67 (24)   | 0.0 (1)     |
| 36             | Library           | Library               | 1           | 3 (35)      | 12 (24)     | 0.08 (40)   | 66.7 (38)   |
| 37             | Separate School   | School                | 1           | 4 (33)      | 9 (25)      | 0.11 (39)   | 75.0 (39)   |
| 38             | Wendy's           | Restaurant Chain      | 1           | 2 (36)      | 3 (37)      | 0.33 (34)   | 50.0 (31)   |
| 39             | Canadian Tire     | Retail Store          | 1           | 2 (36)      | 7 (28)      | 0.14 (37)   | 50.0 (31)   |
| 40             | Shell             | Gas Station           | 1           | 1 (40)      | 2 (40)      | 0.50 (31)   | 0.0 (1)     |
| 41             | Esso              | Gas Station           | 1           | 1 (40)      | 4 (33)      | 0.25 (36)   | 0.0 (1)     |
| <b>Average</b> |                   |                       | <b>16.0</b> | <b>21.5</b> | <b>20.3</b> | <b>1.07</b> | <b>21.5</b> |

**Coverage Efficiency: the actual coverage divided by the number of facilities; Coverage loss: the assumed 24/7 coverage minus actual coverage all divided by assumed 24/7 coverage**

**\*Overall average (averaged over all 41 businesses and municipal locations)**

**†Weighted average (over all 41 businesses and municipal locations, weighted by the *actual coverage* values of each location type)**

**‡ATM, Automated Teller Machine; BMO, Bank of Montreal; CIBC, Canadian Imperial Bank of Commerce; LCBO, Liquor Control Board of Ontario; RBC, Royal Bank of Canada; Separate School, religious schools (students from a religious group); Scotiabank, Bank of Nova Scotia; TD, Toronto-Dominion Bank.**

**The ATM locations consist of stand-alone ATMS and ATMs located in their respective bank branches.**

**Supplemental Table 9. Broad location categories ranked by actual coverage in Toronto on public OHCA not already covered by a registered AED.**

| Rank | Location category‡    | Actual Coverage | Assumed 24/7 Coverage, (Rank) | Number of Facilities, (Rank) | Coverage Efficiency, (Rank) | Coverage Loss, % (Rank) |
|------|-----------------------|-----------------|-------------------------------|------------------------------|-----------------------------|-------------------------|
| 1    | Bank ATM              | 466             | 512 (1)                       | 952 (2)                      | 0.49 (7)                    | 9.0 (5)                 |
| 2    | Restaurant Chain      | 330             | 393 (2)                       | 652 (3)                      | 0.51 (5)                    | 16.0 (7)                |
| 3    | Coffee Shop           | 309             | 367 (3)                       | 558 (4)                      | 0.55 (4)                    | 15.8 (6)                |
| 4    | Bank                  | 176             | 336 (4)                       | 549 (5)                      | 0.32 (10)                   | 47.6 (11)               |
| 5    | Parking Lot           | 127             | 135 (6)                       | 229 (6)                      | 0.55 (3)                    | 5.9 (3)                 |
| 6    | Pharmacy              | 113             | 151 (5)                       | 183 (8)                      | 0.62 (2)                    | 25.2 (8)                |
| 7    | Gas Station           | 103             | 103 (8)                       | 208 (7)                      | 0.50 (6)                    | 0.0 (1)                 |
| 8    | Convenience Store     | 58              | 58 (10)                       | 61 (13)                      | 0.95 (1)                    | 0.0 (1)                 |
| 9    | Liquor/Beer Store     | 51              | 84 (9)                        | 150 (10)                     | 0.34 (9)                    | 39.3 (10)               |
| 10   | School                | 49              | 124 (7)                       | 1018 (1)                     | 0.05 (14)                   | 60.5 (13)               |
| 11   | Recreational Facility | 29              | 46 (11)                       | 159 (9)                      | 0.18 (11)                   | 37.0 (9)                |
| 12   | Retail Store          | 15              | 33 (12)                       | 101 (11)                     | 0.15 (12)                   | 54.5 (12)               |
| 13   | Grocery Store         | 12              | 13 (14)                       | 28 (14)                      | 0.43 (8)                    | 7.7 (4)                 |
| 14   | Library               | 9               | 27 (13)                       | 101 (11)                     | 0.09 (13)                   | 66.7 (14)               |
|      | <b>Average</b>        | <b>131.9</b>    | <b>170.1</b>                  | <b>353.5</b>                 | <b>0.49</b>                 | <b>18.3</b>             |

**Coverage Efficiency:** the actual coverage divided by the number of facilities; **Coverage loss:** the assumed 24/7 coverage minus actual coverage all divided by assumed 24/7 coverage

\*Overall average (averaged over all 14 broad location categories)

†Weighted average (over all 14 broad location categories, weighted by the *actual coverage* values of each location category)

‡ATM, Automated Teller Machine; BMO, Bank of Montreal; CIBC, Canadian Imperial Bank of Commerce; LCBO, Liquor Control Board of Ontario; RBC, Royal Bank of Canada; Separate School, religious schools (students from a religious group); Scotiabank, Bank of Nova Scotia; TD, Toronto-Dominion Bank.  
The ATM locations consist of stand-alone ATMS and ATMs located in their respective bank branches.



**Supplemental Table 10. Broad location categories ranked by actual coverage in downtown Toronto on public OHCA's not already covered by a registered AED.**

| Downtown Rank | Location category‡    | Actual Coverage | Assumed 24/7 Coverage, (Rank) | Number of Facilities, (Rank) | Coverage Efficiency, (Rank) | Coverage Loss, % (Rank) |
|---------------|-----------------------|-----------------|-------------------------------|------------------------------|-----------------------------|-------------------------|
| 1             | Bank ATM              | 128             | 147 (1)                       | 200 (1)                      | 0.64 (7)                    | 12.9 (5)                |
| 2             | Coffee Shop           | 103             | 131 (2)                       | 189 (2)                      | 0.54 (9)                    | 21.4 (6)                |
| 3             | Restaurant Chain      | 92              | 118 (3)                       | 127 (3)                      | 0.72 (4)                    | 22.0 (8)                |
| 4             | Pharmacy              | 44              | 56 (5)                        | 38 (7)                       | 1.16 (2)                    | 21.4 (7)                |
| 5             | Bank                  | 41              | 73 (4)                        | 88 (4)                       | 0.47 (11)                   | 43.8 (11)               |
| 6             | Parking Lot           | 26              | 28 (6)                        | 39 (6)                       | 0.67 (6)                    | 7.1 (4)                 |
| 7             | Convenience Store     | 18              | 18 (9)                        | 8 (13)                       | 2.25 (1)                    | 0.0 (1)                 |
| 8             | Liquor/Beer Store     | 17              | 24 (8)                        | 25 (8)                       | 0.68 (5)                    | 29.2 (9)                |
| 9             | Recreational Facility | 11              | 16 (11)                       | 20 (9)                       | 0.55 (8)                    | 31.3 (10)               |
| 10            | School                | 9               | 26 (7)                        | 57 (5)                       | 0.16 (13)                   | 65.4 (13)               |
| 11            | Retail Store          | 7               | 17 (10)                       | 15 (10)                      | 0.47 (10)                   | 58.8 (12)               |
| 12            | Gas Station           | 4               | 4 (12)                        | 9 (12)                       | 0.44 (12)                   | 0.0 (1)                 |
| 13            | Grocery Store         | 4               | 4 (12)                        | 4 (14)                       | 1.00 (3)                    | 0.0 (1)                 |
| 14            | Library               | 1               | 3 (14)                        | 12 (11)                      | 0.08 (14)                   | 66.7 (14)               |
|               | <b>Average</b>        | <b>36.1</b>     | <b>47.5</b>                   | <b>59.4</b>                  | <b>0.71</b>                 | <b>21.2</b>             |

**Coverage Efficiency: the actual coverage divided by the number of facilities; Coverage loss: the assumed 24/7 coverage minus actual coverage all divided by assumed 24/7 coverage**

**\*Overall average (averaged over all 14 broad location categories)**

**†Weighted average (over all 14 broad location categories, weighted by the *actual coverage* values of each location category)**

**‡ATM, Automated Teller Machine; BMO, Bank of Montreal; CIBC, Canadian Imperial Bank of Commerce; LCBO, Liquor Control Board of Ontario; RBC, Royal Bank of Canada; Separate School, religious schools (students from a religious group); Scotiabank, Bank of Nova Scotia; TD, Toronto-Dominion Bank.**

**The ATM locations consist of stand-alone ATMS and ATMs located in their respective bank branches.**

## Section 3. Supplemental Figures and Figure Legends

### Section 3.1. Map of facilities

Supplemental Figures 1 – 6 showcase the distribution of facilities of the Top 5 ranked businesses and municipal locations (Tim Hortons, RBC ATM, Subway, Scotiabank ATM, CIBC ATM) in all of Toronto and downtown Toronto.

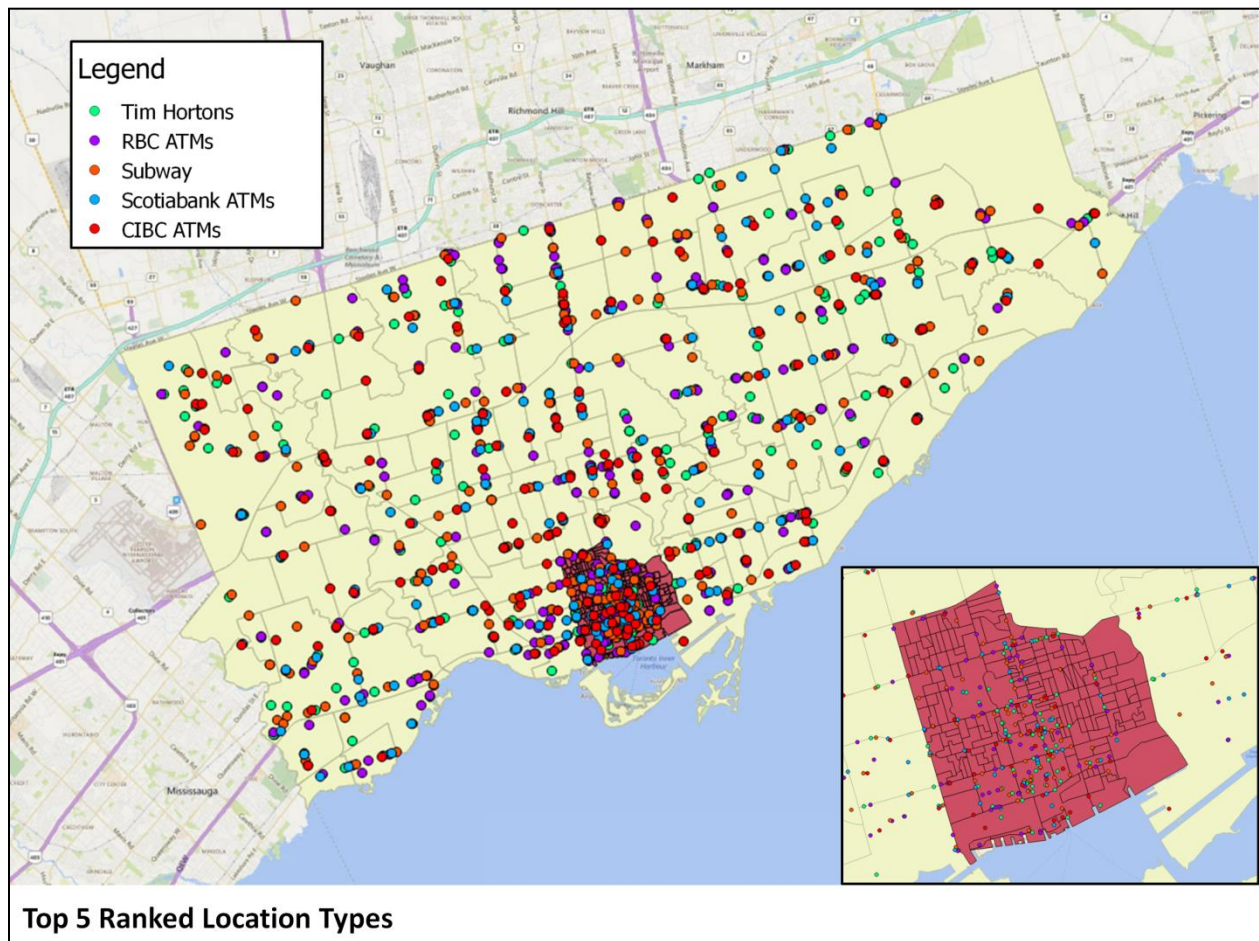

Supplemental Figure 1. Map of the facilities of the Top 5 ranked businesses in terms of actual coverage in all of Toronto.

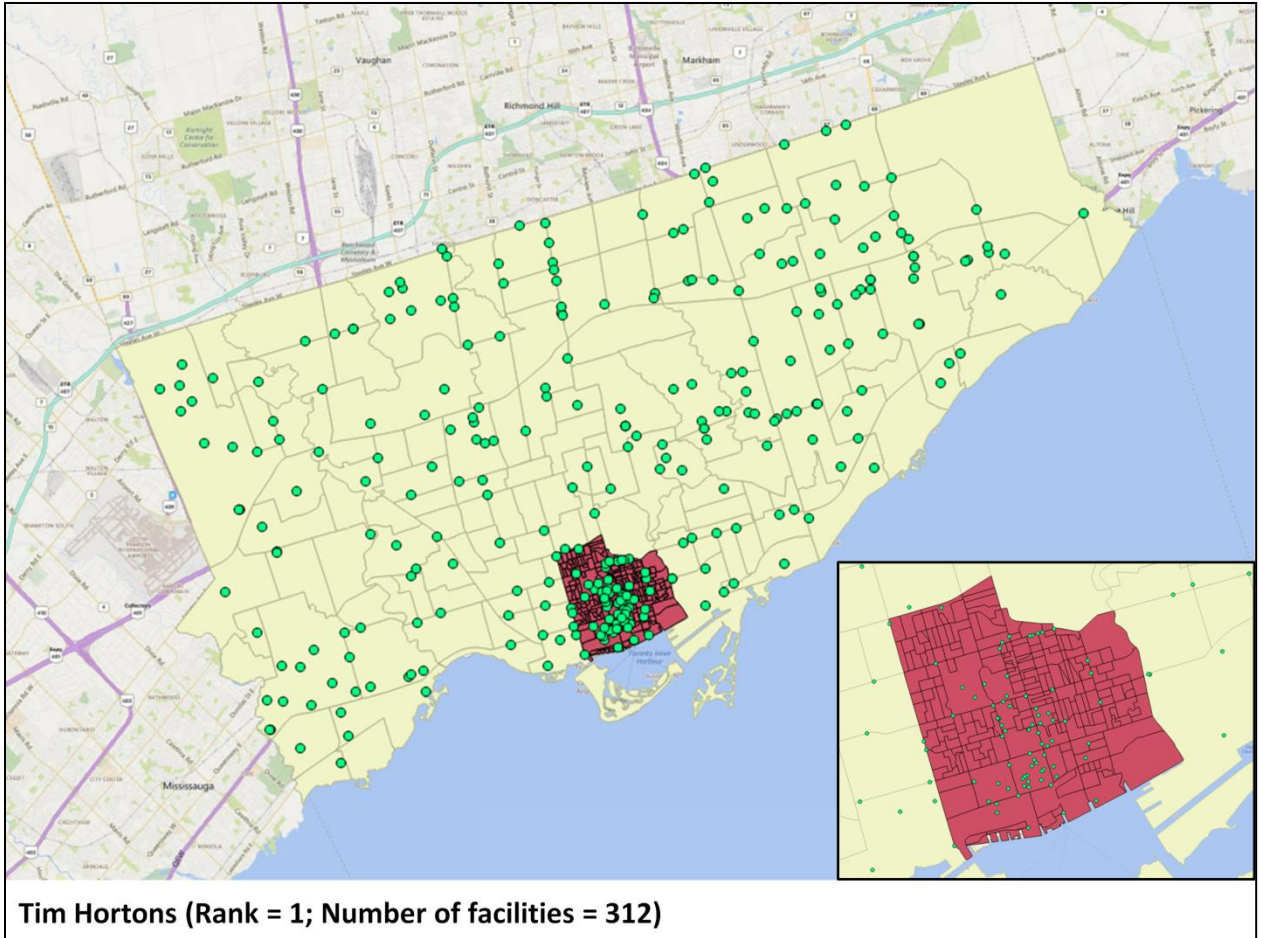

Supplemental Figure 2. Map of the facilities of the Tim Hortons (Coffee Shop) in Toronto.

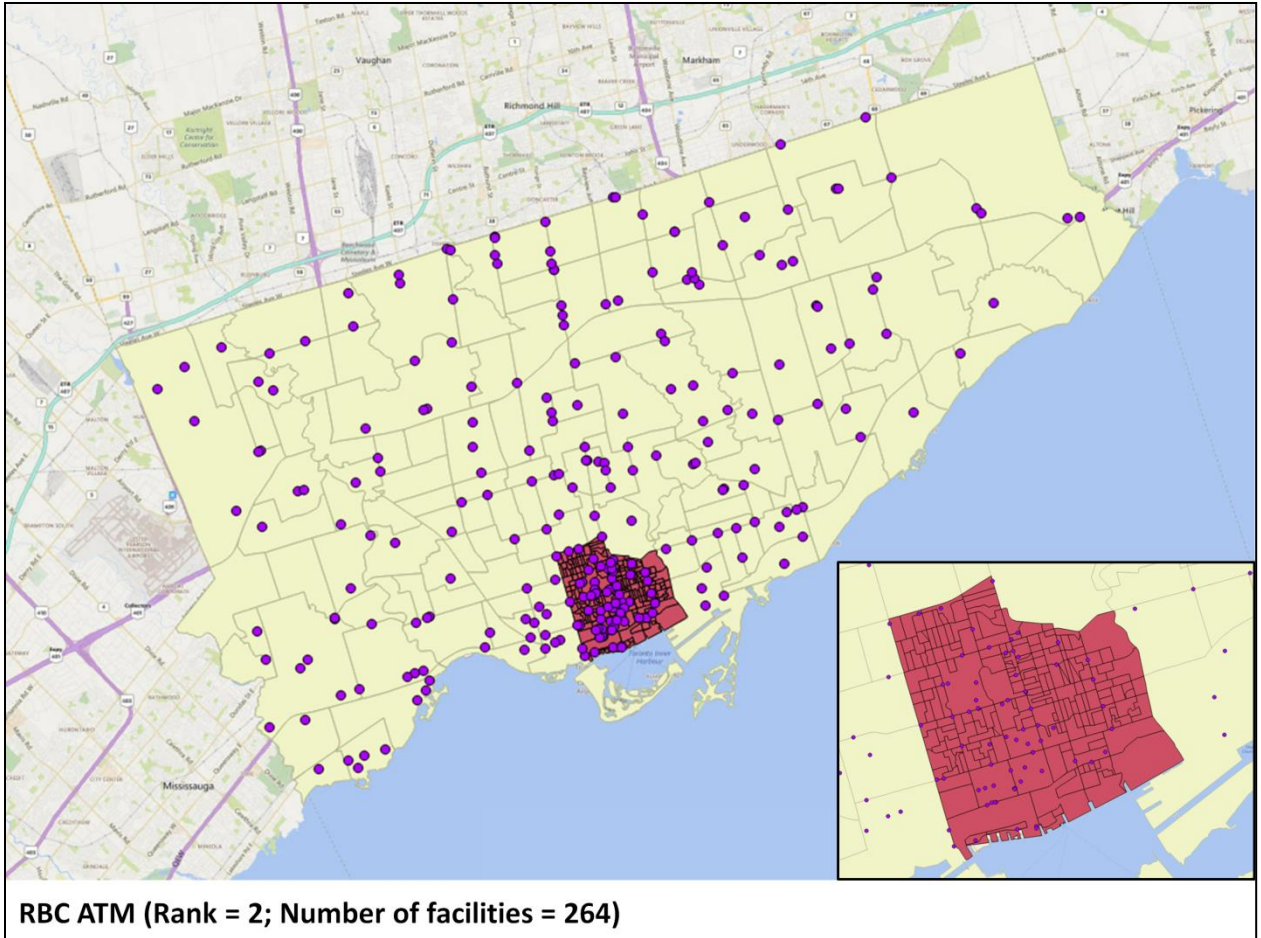

Supplemental Figure 3. Map of the facilities of Royal Bank of Canada (RBC) ATMs (Bank ATM) in Toronto.

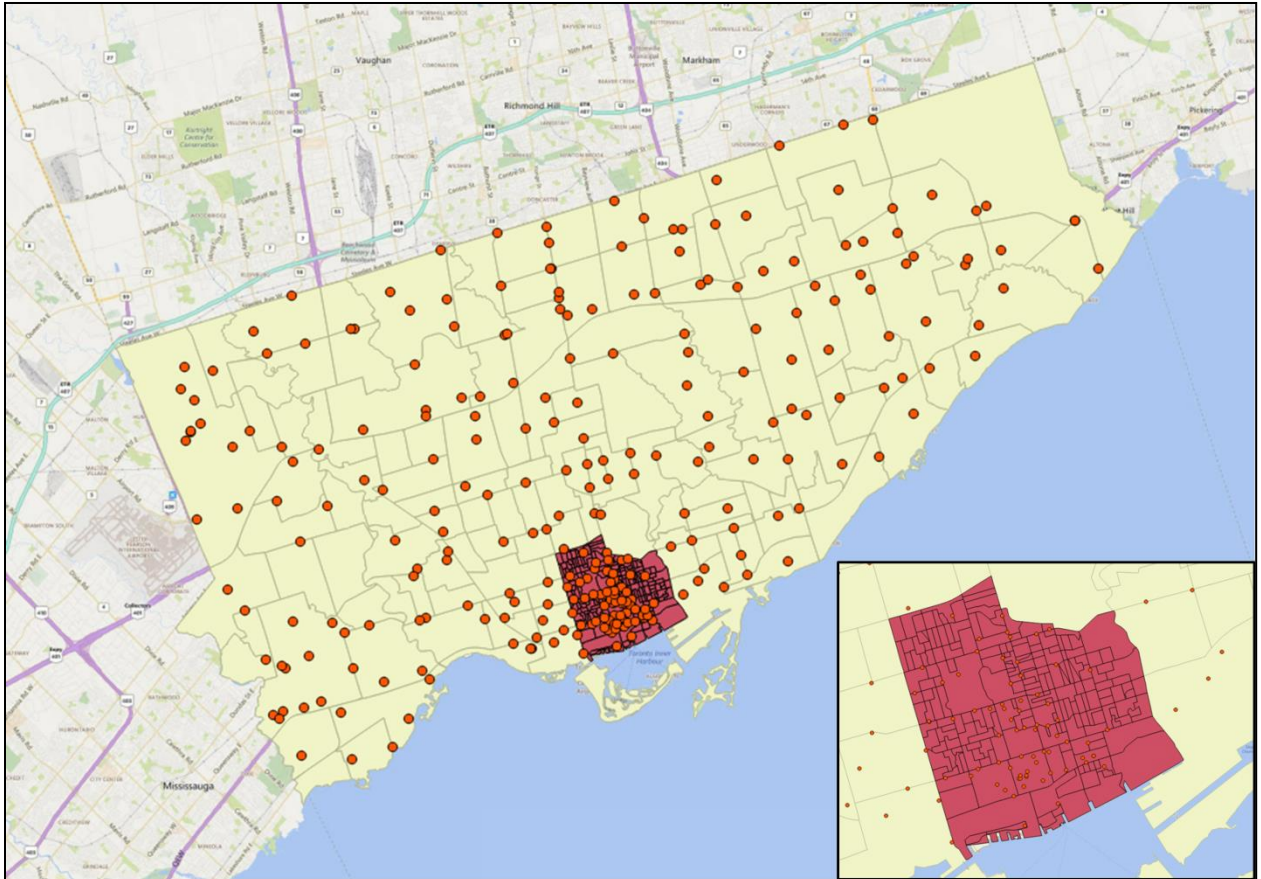

**Subway (Rank = 3; Number of facilities = 281)**

**Supplemental Figure 4. Map of the facilities of Subway (Restaurant Chain) in Toronto.**

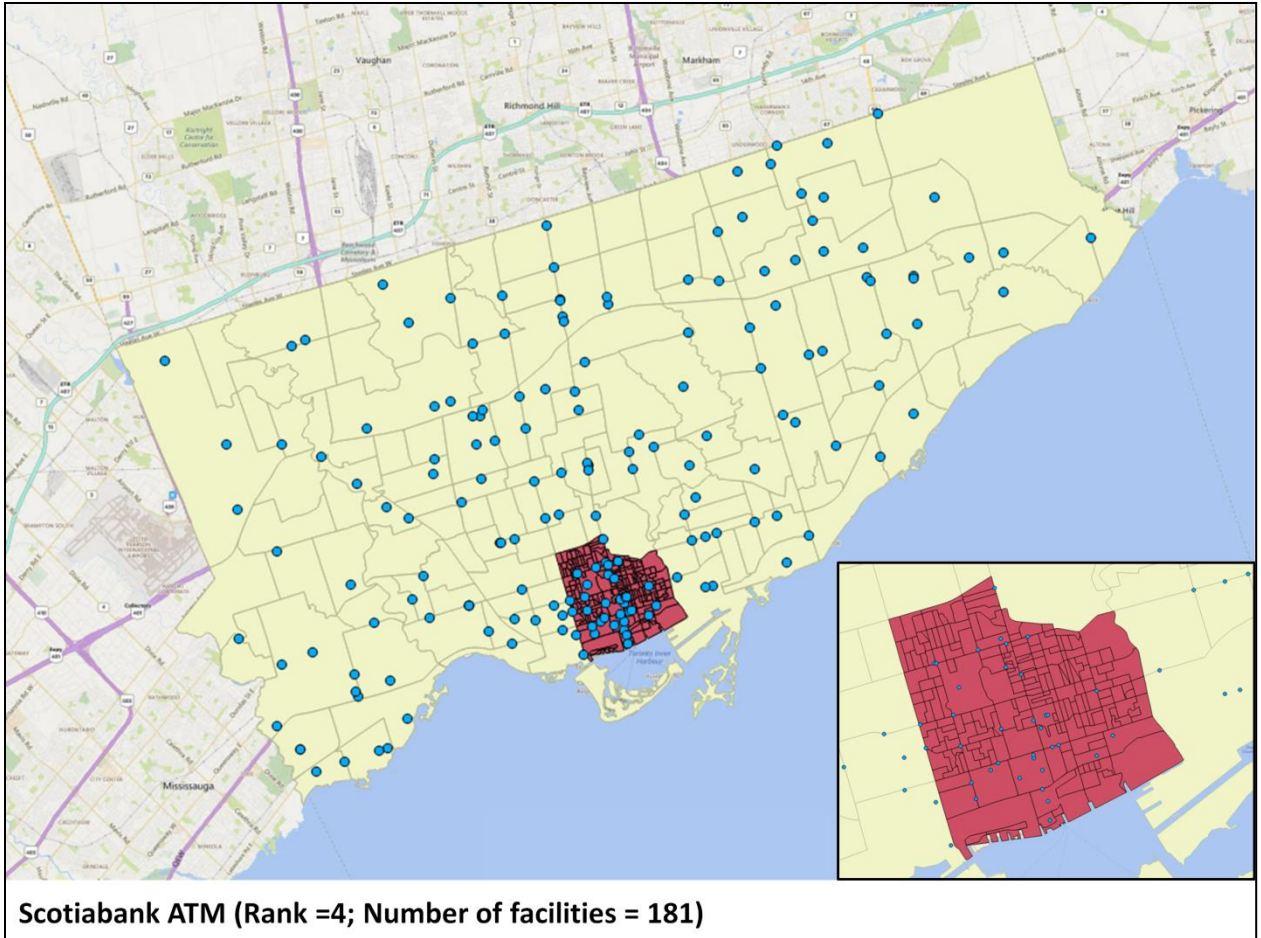

Supplemental Figure 5. Map of the facilities of Scotiabank ATMs (Bank ATM) in Toronto.

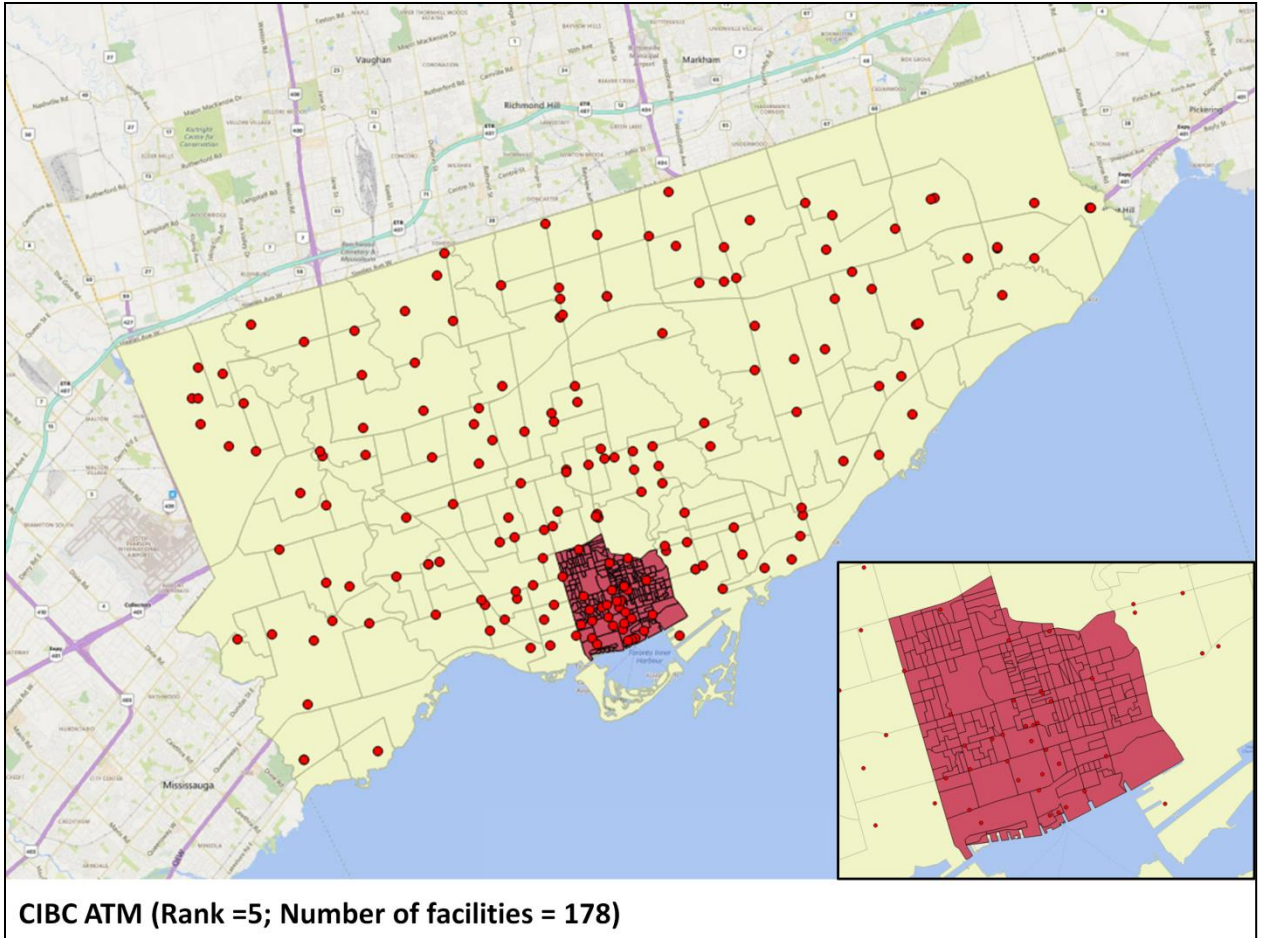

Supplemental Figure 6. Map of the facilities of the Canadian Imperial Bank of Commerce (CIBC) ATMs (Bank ATM) in Toronto.
